# Supplementary material for: Class 1 integrons in clinical and swine industry isolates of Salmonella Typhimurium from Colombia, dating 1997 to 2017
Source: bioRxiv or medRxiv preprint supplement (doi:10.1101/2022.02.14.22270819), 2022-02-15
Supplement: Supplementary file [file media-1.pdf]

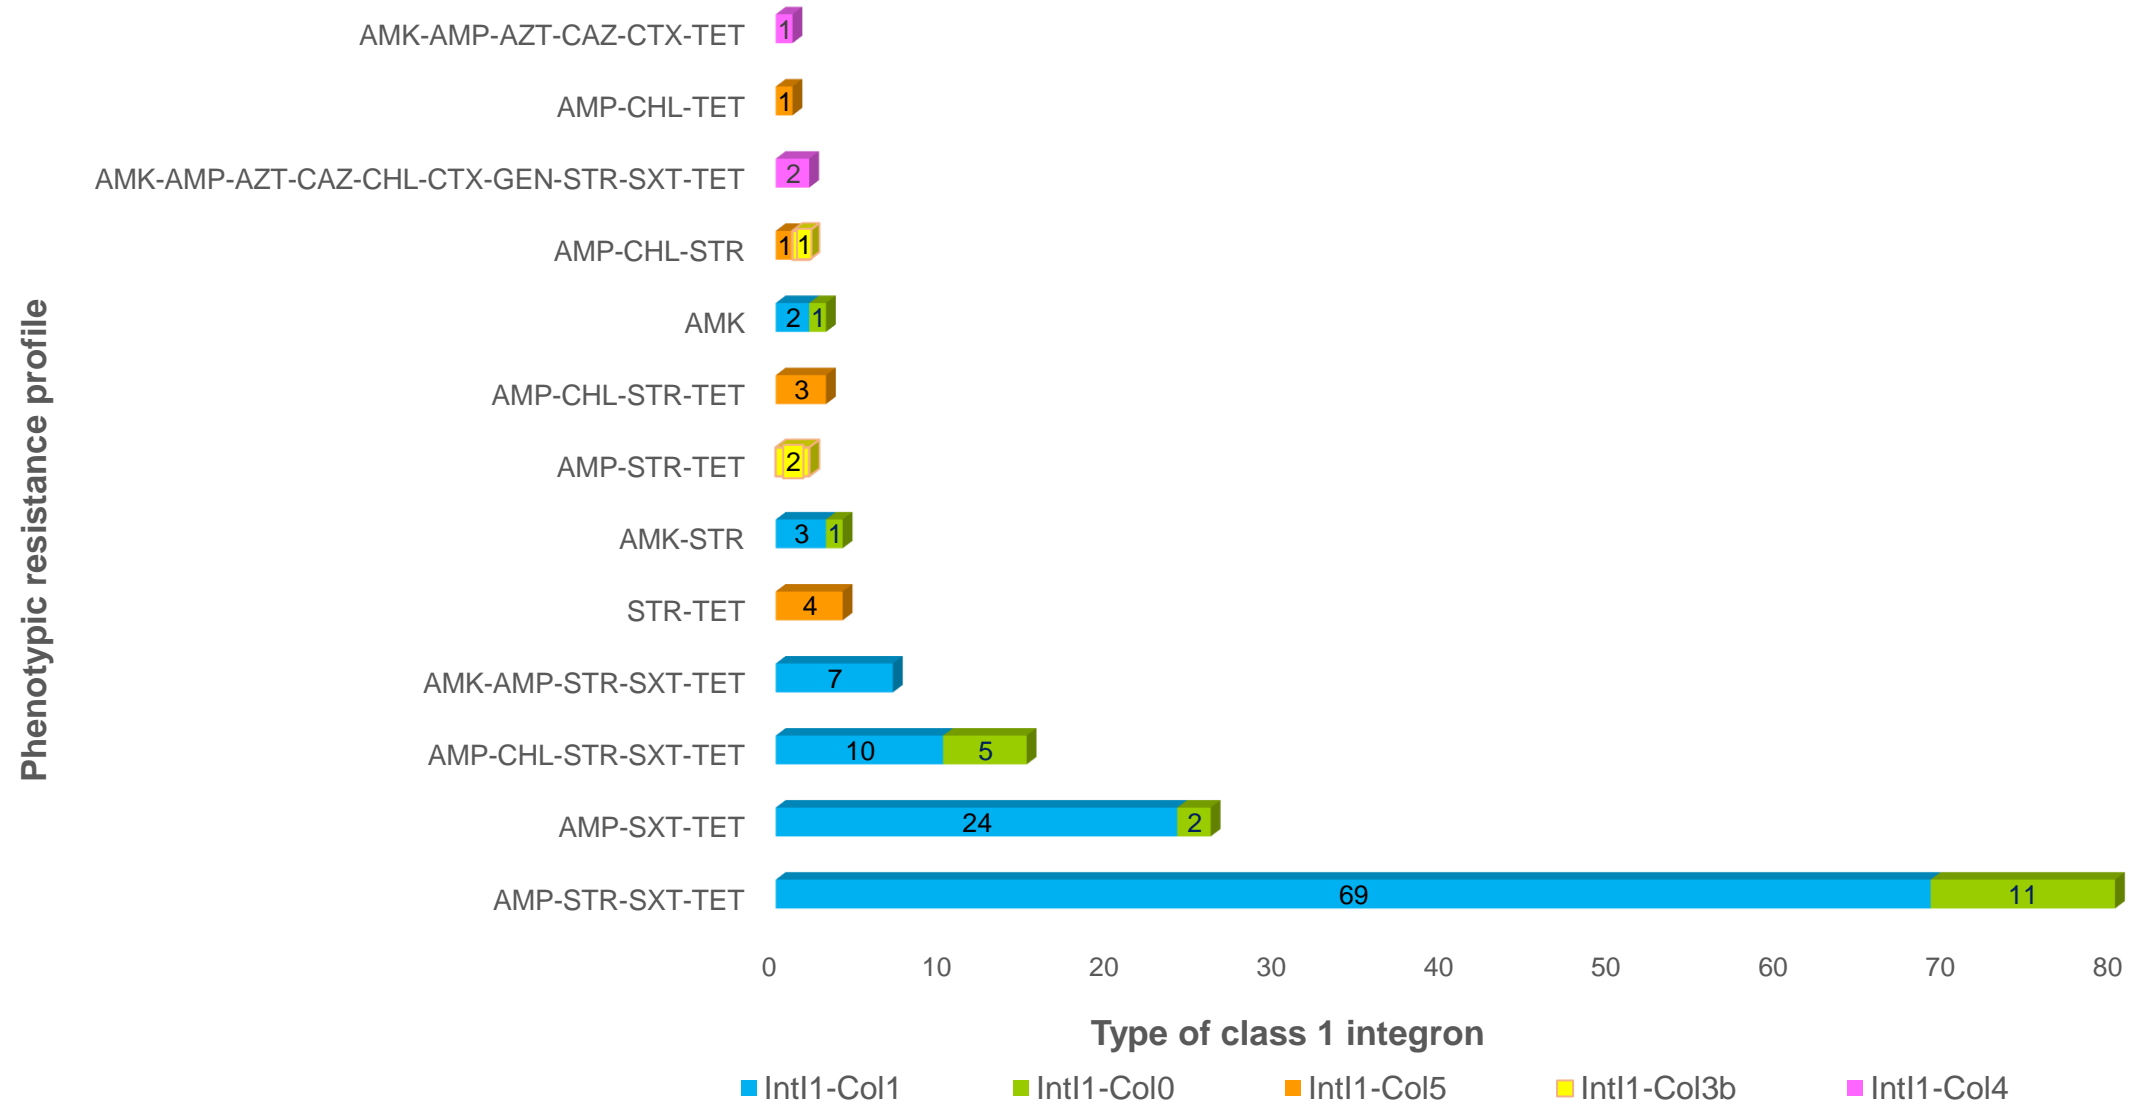

**Figure S1.** Susceptibility profile and main types of class 1 integrons ( $n \geq 3$ ) detected in *S. Typhimurium* isolates from Colombian clinical samples, during 1997-2017.

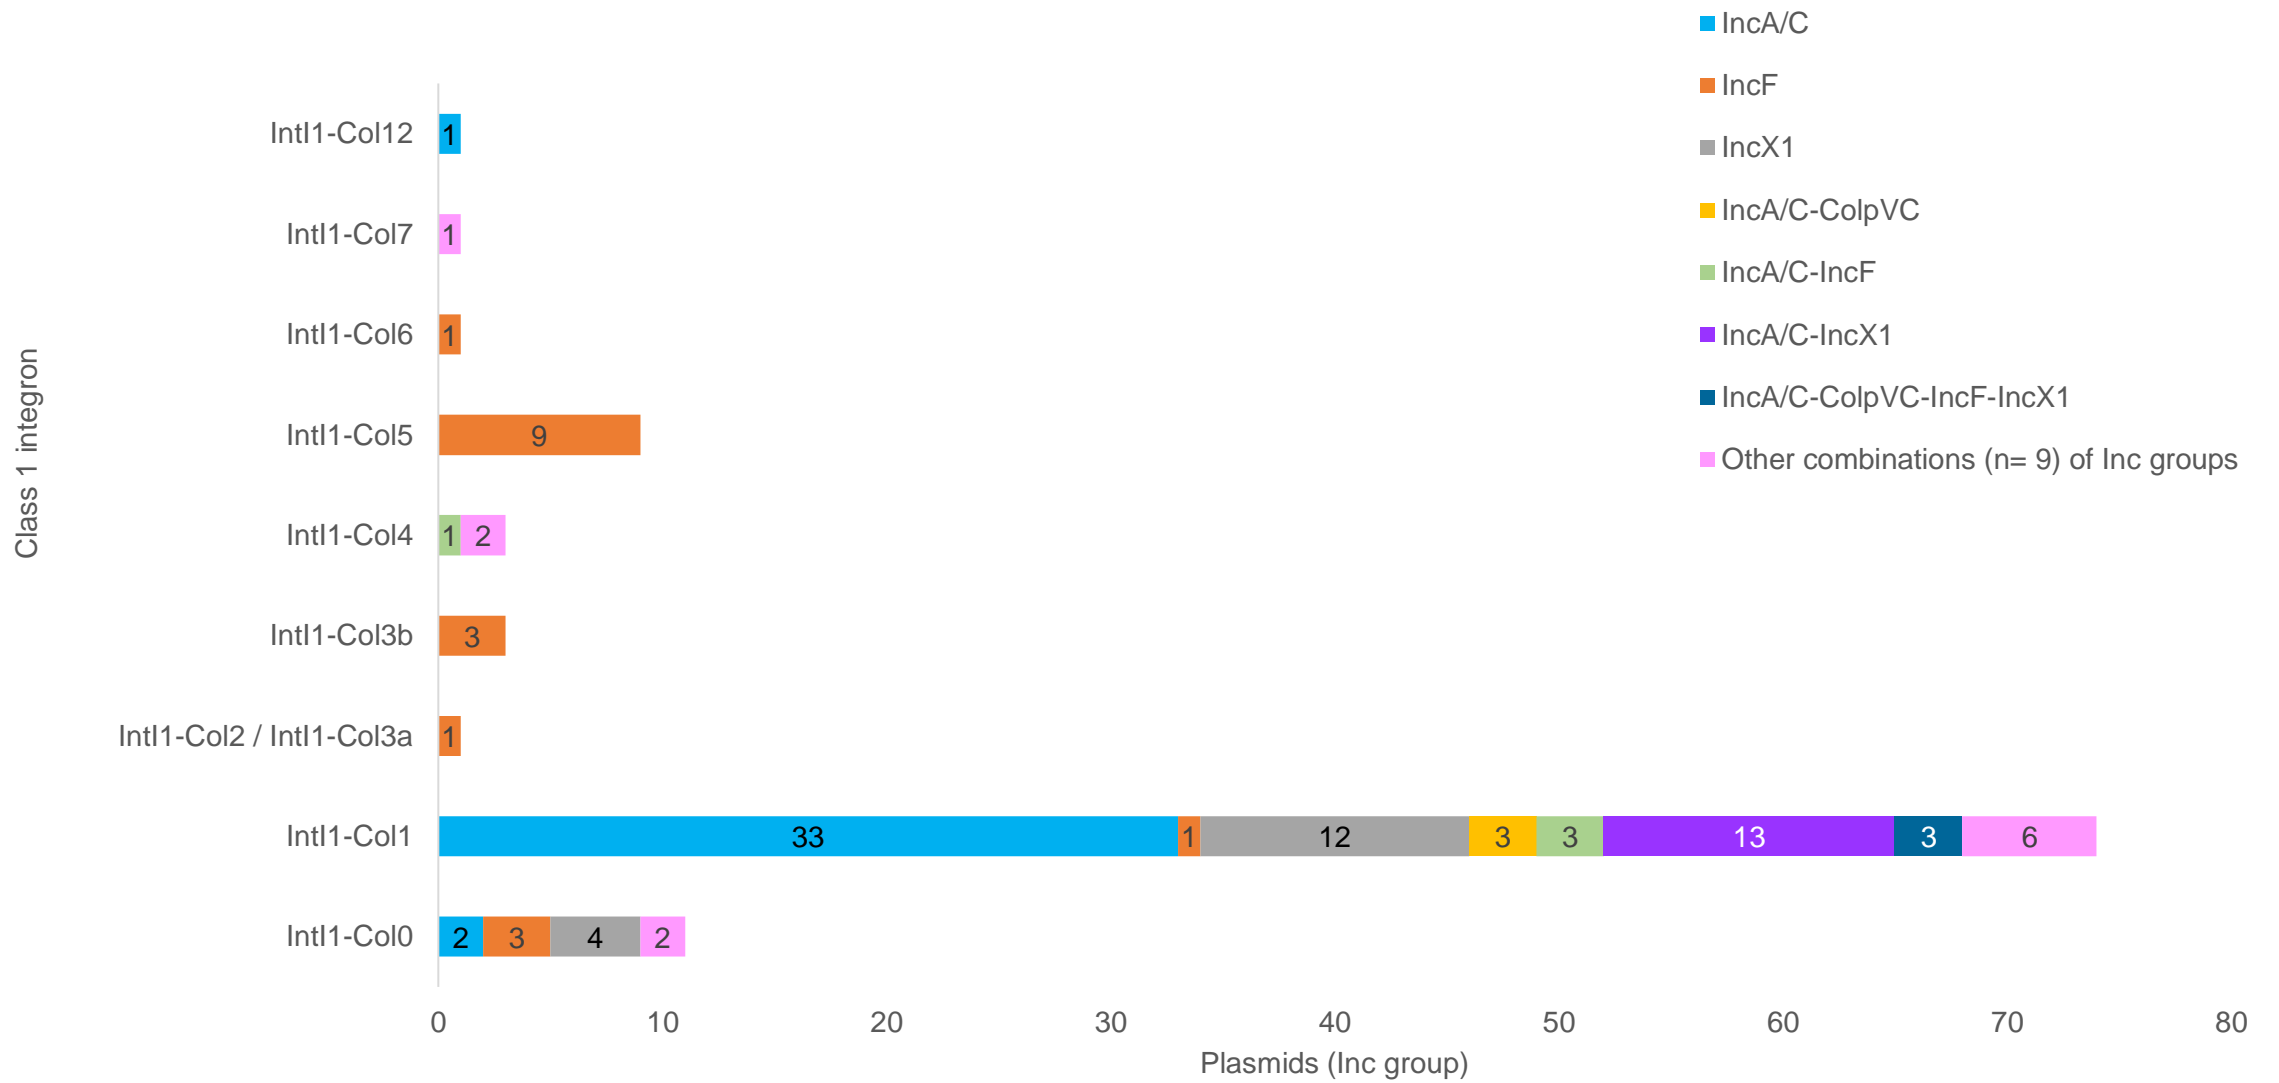

**Figure S2.** Class 1 integrons types and Inc groups of plasmids in *S. Typhimurium* from Colombia (Col), 1997-2017.

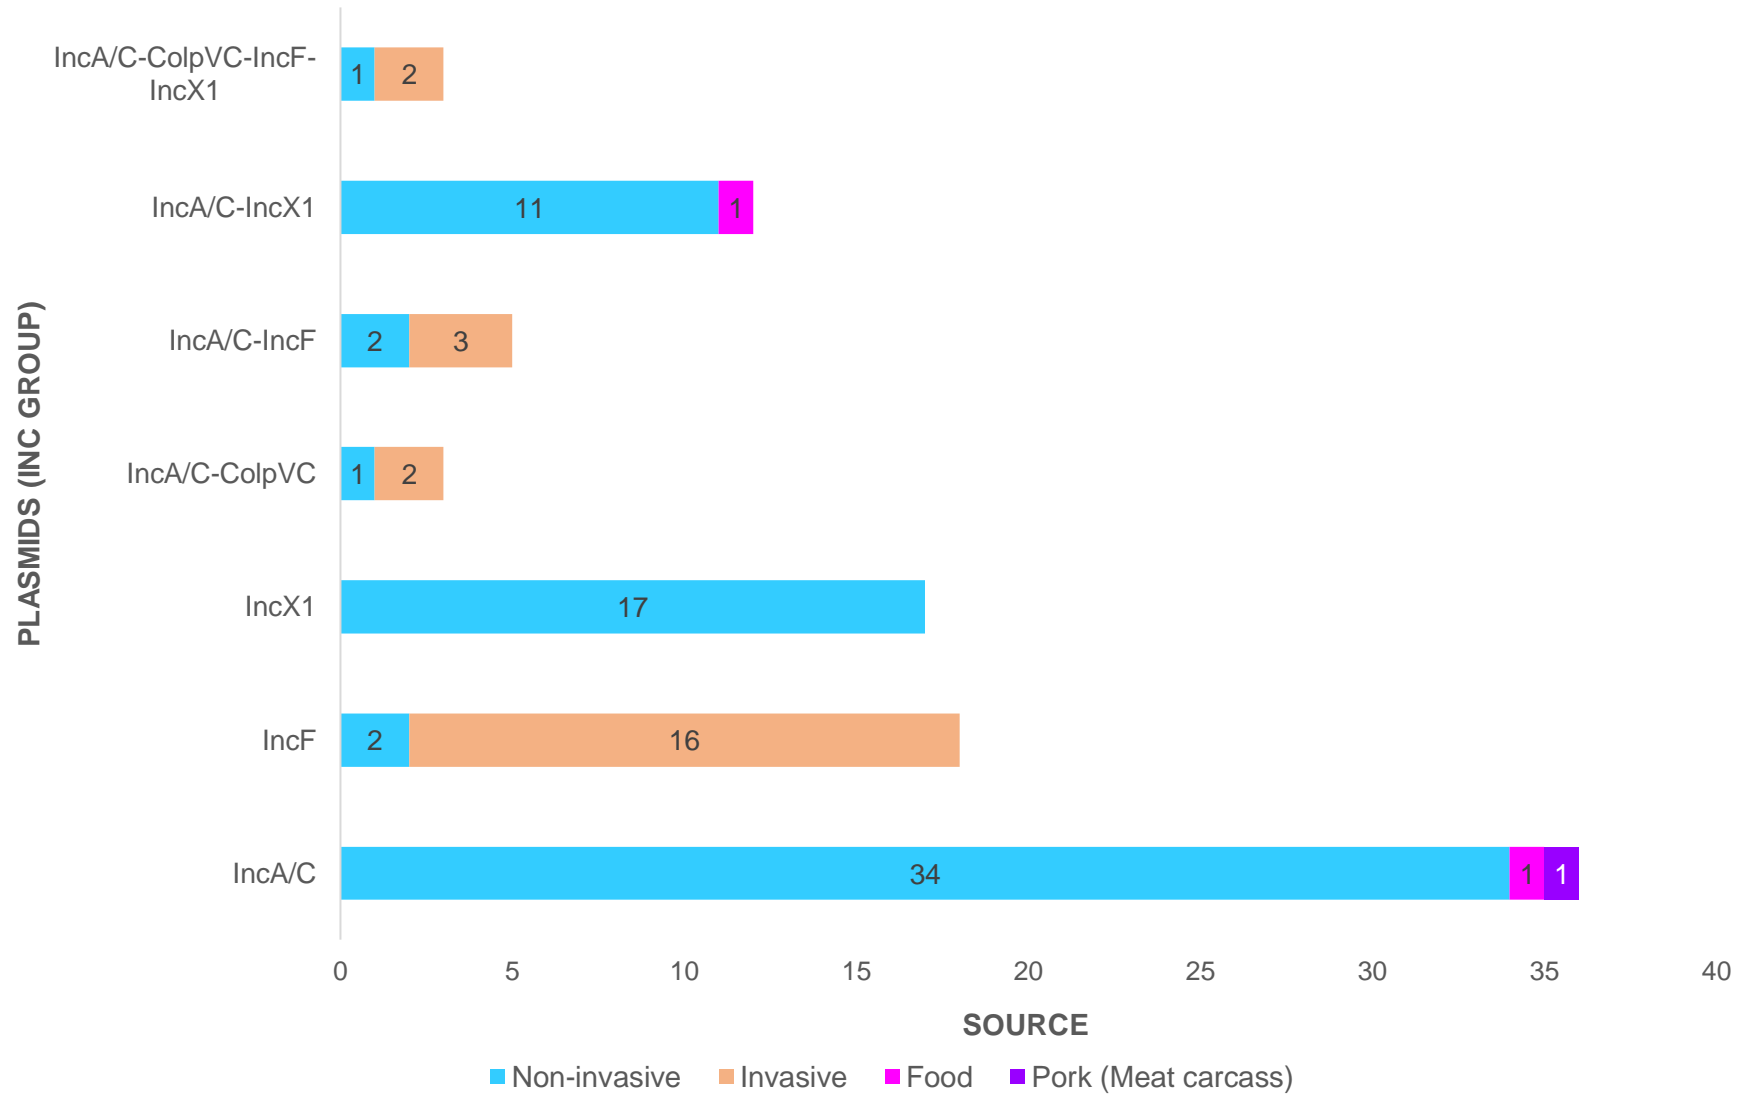

**Figure S3.** Inc groups of plasmids (n≥3) and source in *S. Typhimurium* isolates from Colombia, during 1997-2017.
